# Supplementary material for: Adaptation of the Banff Patellofemoral Instability Instrument (BPII) 2.0 into Swedish
Source: PubMed Central journal article supplement — Acta Orthop. 2023 Oct 31;94:537–42. doi: 10.2340/17453674.2023.21194 (PMC10617520; doi:10.2340/17453674.2023.21194), 2023-10-31
Supplement: ActaO-94-21194-s001.pdf [file ActaO-94-21194-s001.pdf]

## BPII 2.0 Swedish Version

### BANFF Frågeformulär vid knäskålsinstabilitet 2.0

#### En värdering av livskvalité hos patienter med knäskålsinstabilitet

Ditt namn: \_\_\_\_\_

Datum för undersökning: \_\_\_\_\_

Din läkares namn: \_\_\_\_\_

Vilket knä är aktuellt idag och vilket besök?

- |                                  |                                                                |                                                |
|----------------------------------|----------------------------------------------------------------|------------------------------------------------|
| <input type="checkbox"/> Vänster | <input type="checkbox"/> Första undersökningen                 | <input type="checkbox"/> Operationsdagen       |
| <input type="checkbox"/> Höger   | <input type="checkbox"/> 3 mån efter icke kirurgisk behandling | <input type="checkbox"/> 3 mån efter operation |
| <input type="checkbox"/> Båda    | <input type="checkbox"/> 6 mån efter icke kirurgisk behandling | <input type="checkbox"/> 6 mån efter operation |
|                                  | <input type="checkbox"/> 1 år efter icke kirurgisk behandling  | <input type="checkbox"/> 1 år efter operation  |
|                                  | <input type="checkbox"/> 2 år efter icke kirurgisk behandling  | <input type="checkbox"/> 2 år efter operation  |

#### Instruktioner

Vänligen svara på frågorna utifrån aktuell situation, funktion, omständigheter och funderingar med hänsyn till ditt knä med en instabil (ostadig) knäskål. Överväg hur det varit de tre senaste månaderna.

Markera med ett streck (/) på linjen på en skala från 0 till 100 den punkt som närmast representerar din situation idag.

Till exempel, följande fråga;

Är det här ett bra formulär?

0 \_\_\_\_\_ 100  
Värdelöst Fantastiskt

Om strecket placerats på mitten av linjen betyder det att formulärets kvalité är medelbra, eller med andra ord, mitt emellan extremerna "värdelöst" och "fantastiskt". Det är viktigt att du sätter ditt streck i respektive ände om de extrema beskrivningarna stämmer med hur du uppfattar din situation.



9. Har kostnader pga. din knäskada lett till ekonomiska problem för dig eller din familj?

0 \_\_\_\_\_ 100  
Stora ekonomiska problem Inga ekonomiska problem

#### Del C: Fritid/Idrott/Aktivitet

10. Hur orolig är du för att dina fritids eller idrottsaktiviteter kan göra ditt knä sämre?

0 \_\_\_\_\_ 100  
Extremt orolig Inte orolig alls

11. Måste du vara försiktig när du deltar i fritidsaktiviteter eller idrott?  
(Sätt strecket längst till vänster, dvs 0, om du inte kan delta alls pga. ditt knä.)

0 \_\_\_\_\_ 100  
Extremt försiktig Inte alls försiktig

12. Hur orolig är du för att knäskålen ska "hoppa ur led" när du deltar i fritidsaktiviteter eller idrott?  
(Sätt strecket längst till vänster, dvs 0, om du inte kan delta alls pga. ditt knä.)

0 \_\_\_\_\_ 100  
Extremt orolig Inte orolig alls

13. Hur orolig är du över att gå på ojämnt underlag, på blött underlag eller på is?

0 \_\_\_\_\_ 100  
Extremt orolig Inte orolig alls

14. Kan du delta fullt ut (vara med på allt) i fritidsaktiviteter eller idrott?  
(Sätt strecket längst till vänster, dvs 0, om du inte kan delta alls pga. ditt knä.)

0 \_\_\_\_\_ 100  
Aldrig möjligt Alltid möjligt

#### Del D: Levnadssätt

15. Hur orolig är du för din allmänna säkerhet pga. ditt knäproblem?  
Till exempel: att gå upp och ner för trappor, eller att bära små barn, etc.

0 \_\_\_\_\_ 100  
Extremt orolig Inte orolig alls
